these two spaces are adjacent to each other, only separated by Charles Street, they are two distinct parks. I hope this clarification helps steer visitors in the right direction to admire perhaps the most visible symbol of our specialty.

### Competing Interests

The author declares no competing interests.

Rafael Ortega, M.D. Boston University School of Medicine,  
Boston, Massachusetts. Rortega@bu.edu

DOI: 10.1097/ALN.0000000000004022

### Reference

1. Orser BA: Anesthesiology: Resetting our sights on long-term outcomes: The 2020 John W. Severinghaus lecture on translational science. *ANESTHESIOLOGY* 2021; 135:18–30

(Accepted for publication September 14, 2021. Published online first on October 12, 2021.)

---

## 2020 Severinghaus Lecture on Translational Science: Reply

### In Reply:

I thank Dr. Ortega<sup>1</sup> for clarifying the location of the Ether Monument in the Boston Public Garden. In fact, no living person is better suited to point out my oversight.<sup>2</sup> In 2006, Dr. Ortega published a book entitled *Written in Granite: An Illustrated History of the Ether Monument*.<sup>3</sup> He has also contributed to the restoration of the Ether Monument. In 2004, when the City of Boston undertook a complete restoration of the monument, an endowment fund was created to maintain the structure.<sup>4</sup> The proceeds from Dr. Ortega's book have been directed to the endowment fund, helping to support the preservation of the statue.<sup>5</sup>

In the 2020 John W. Severinghaus Lecture on Translational Science, I described the Ether Monument as a symbolic reminder of "relentless innovation."<sup>2</sup> Only through such innovation will we ensure that all patients gain access to anesthesia care that improves their long-term outcomes. The Ether Monument, with its location now correctly identified, is well worth a visit the next time you are in Boston.

### Research Support

This work was supported by a Foundation Grant (FDN-154312) from the Canadian Institutes of Health Research (Ottawa, Ontario, Canada) to Dr. Orser.

### Competing Interests

Dr. Orser serves on the Board of Trustees of the International Anesthesia Research Society (San Francisco, California) and is a codirector of the Perioperative Brain Health Center (Toronto, Ontario, Canada; <http://www.perioperativebrainhealth.com>). She is a named inventor on a Canadian patent (2,852,978) and two U.S. patents (9,517,265 and 10,981,954). Dr. Orser collaborates on clinical studies that are supported by in-kind software donations from Cogstate Ltd. (New Haven, Connecticut).

Beverley A. Orser, M.D., Ph.D., F.R.C.P.C., F.C.A.H.S., F.R.S.C.  
University of Toronto, Toronto, Ontario, Canada. [beverley.orser@utoronto.ca](mailto:beverley.orser@utoronto.ca)

DOI: 10.1097/ALN.0000000000004023

### References

1. Ortega R: 2020 Severinghaus lecture on translational science: Comment. *ANESTHESIOLOGY* 2021; 136:245–7
2. Orser BA: Anesthesiology: Resetting our sights on long-term outcomes: The 2020 John W. Severinghaus lecture on translational science. *ANESTHESIOLOGY* 2021; 135:18–30
3. Ortega, RA: *Written in granite: An illustrated history of the Ether Monument*. Boston, Plexus Management, 2006
4. Ortega RA, Kelly LR, Yee MK, Lewis KP: *Written in granite: A history of the Ether Monument and its significance for anesthesiology*. *ANESTHESIOLOGY* 2006; 105:838–42
5. Ellison N: Book reviews: *Written in granite: An illustrated history of the Ether Monument*. *Anesth Analg* 2007; 104:1008

(Accepted for publication September 14, 2021. Published online first on October 12, 2021.)

---

## Perioperative Pulmonary Aspiration: Comment

### To the Editor:

The closed claims analysis of cases of pulmonary aspiration of gastric content by Warner *et al.*<sup>1</sup> includes

important information regarding the impact of the administration of cricoid pressure. In the 49 claims that included endotracheal intubation, cricoid pressure was applied in 22 (45%) and not applied in 19 (39%). In other words, in this cohort pulmonary aspiration was reported more often during than in the absence of applied cricoid pressure. This finding reemphasizes the lack of scientific evidence for a protective effect of cricoid pressure application.<sup>2-4</sup> The authors explicitly acknowledge this fact. Therefore, the onsite anesthesiologist reviewers' judgment that lack of use of cricoid pressure contributed to aspirations in 15 claims is unjustified.

Administration of cricoid pressure has been documented to be associated with numerous adverse effects, including provocation of gagging and vomiting when applied early during induction of anesthesia<sup>5</sup>; worsening of laryngoscopic and intubating conditions<sup>6-8</sup>; a decrease in lower esophageal sphincter tone<sup>9,10</sup>; highly variable location, direction, and degree of applied force<sup>11</sup>; and increased physical and cognitive workload for the practitioners.<sup>12</sup> All of these factors may facilitate gastric regurgitation and subsequent pulmonary aspiration. It could thus be reasonably argued that use of cricoid pressure contributed as much to the aspirations in 22 (45%) claims as did lack of it. For that very reason, use of cricoid pressure should have been listed under "Clinical Care Issues in Aspiration Claims" (table 5 of the publication), just as lack of cricoid pressure was.<sup>1</sup>

In 79% of the 115 analyzed claims, only one anesthesia professional had cared for the patient, a nasogastric tube was in place immediately before the procedure in only 51% of patients with documented gastrointestinal obstruction or other acute intraabdominal pathology, and more than three attempts at endotracheal intubation were noted in 10 claims.<sup>1</sup> Quantitative information regarding the incidences of those clinical care issues during and in the absence of administration of cricoid pressure would help to understand why pulmonary aspirations occurred with comparable frequency under both circumstances. Possibly, clinical care issues other than use or nonuse of cricoid pressure were the primary determinants of pulmonary aspiration. After all, the three major factors considered to be important in reducing the incidence of pulmonary aspiration are experience, assistance by experienced anesthesiologists, and close supervision of inexperienced anesthesiologists.<sup>13</sup>

For the numerous documented adverse effects of cricoid pressure and its unproven clinical benefit, many anesthesiologists have abandoned this practice altogether. However, a considerable number of anesthesiologists continue with this practice for mostly medicolegal concerns. In a recent electronic survey of randomly selected Fellows of the Australian and New Zealand College of Anaesthetists designed to quantify the use of cricoid pressure in patients presumed to be at risk of gastric regurgitation, and to identify the potential impact of medicolegal

concerns on clinical decision making, 267 respondents indicated to routinely apply cricoid pressure.<sup>14</sup> Of note, for 159 (60%) of them, the potential medicolegal consequences of not using cricoid pressure in a patient who subsequently aspirates were one of the main reasons for doing so. Anesthesiologist reviewers' judgment that omission of cricoid pressure contributes to cases of pulmonary aspiration,<sup>1</sup> and continued recommendation by some current guidelines of national professional societies to administer cricoid pressure,<sup>15,16</sup> are likely to contribute to those medicolegal concerns. The continued recommendations of British professional societies to use cricoid pressure<sup>15,16</sup> may explain why the United Kingdom is one of only a few countries in which cricoid pressure is still frequently applied, especially when compared with other European countries. In a questionnaire distributed electronically to instructors of the European Trauma Course, the use of cricoid pressure during rapid sequence induction in trauma patients was reported twice as often by instructors from the United Kingdom (83.1%) compared with those from all other countries (39.4%), with the lowest use in Denmark (12.5%).<sup>17</sup>

In the absence of conclusive evidence for a benefit of use of cricoid pressure, use of this practice for mostly medicolegal reasons is of concern. Several professional societies have recognized this dilemma and adjusted their recommendations accordingly. For example, the 2010 Scandinavian Clinical Practice Guidelines on General Anesthesia for Emergency Situations,<sup>18</sup> the 2015 Guideline on Airway Management released by the Board of the German Society of Anesthesiology and Intensive Care Medicine,<sup>19</sup> and the 2021 updated consensus-based recommendations for management of the difficult airway by the Canadian Airway Focus Group<sup>20</sup> no longer recommend routine application of cricoid pressure. The 2021 European Resuscitation Council Guidelines for Adult Advanced Life Support specifically discourage the use of cricoid pressure altogether.<sup>21</sup>

The use of cricoid pressure as an essential component of rapid sequence induction is decreasing.<sup>17,22</sup> Guidelines must be phrased in a manner that clearly reflect existing scientific evidence. In the absence of conclusive evidence of a benefit of cricoid pressure, but with evidence of numerous adverse effects of it,<sup>23,24</sup> lack of its application should *per se* no longer be considered a contributory factor to pulmonary aspiration. Anesthesiologists who are convinced that the documented disadvantages of cricoid pressure outweigh the postulated advantages should be able to exercise their judgment without fear of medicolegal consequences. "Expert" opinion must be based on conclusive scientific evidence. Otherwise, traditional practice considered "safe practice" may actually be compromising safe practice.<sup>25</sup>

## Competing Interests

The author declares no competing interests.

Hans-Joachim Priebe, M.D. Medical Center University of Freiburg, Freiburg, Germany. hans-joachim.priebe@uniklinik-freiburg.de

The corresponding author of the original article referenced above has read the letter and does not have anything to add in a published reply.—Evan D. Kharasch, M.D., Ph.D., Editor-in-Chief

DOI: 10.1097/ALN.0000000000004056

## References

- Warner MA, Meyerhoff KL, Warner ME, Posner KL, Stephens L, Domino KB: Pulmonary aspiration of gastric contents: A closed claims analysis. *ANESTHESIOLOGY* 2021; 135:284–91
- Algie CM, Mahar RK, Tan HB, Wilson G, Mahar PD, Wasiak J: Effectiveness and risks of cricoid pressure during rapid sequence induction for endotracheal intubation. *Cochrane Database Syst Rev* 2015; 11:CD011656
- Birenbaum A, Hajage D, Roche S, Ntoubas A, Eurin M, Cuvillon P, Rohn A, Compere V, Benhamou D, Biais M, Menut R, Benachi S, Lenfant F, Riou B; IRIS Investigators Group: Effect of cricoid pressure compared with a sham procedure in the rapid sequence induction of anesthesia: The IRIS randomized clinical trial. *JAMA Surg* 2019; 154:9–17
- Zdravkovic M, Rice MJ, Brull SJ: The clinical use of cricoid pressure: First, do no harm. *Anesth Analg* 2021; 132:261–7
- Vanner RG, Pryle BJ: Regurgitation and oesophageal rupture with cricoid pressure: a cadaver study. *Anaesthesia* 1992; 47:732–5
- Hartsilver EL, Vanner RG: Airway obstruction with cricoid pressure. *Anaesthesia* 2000; 55:208–11
- Palmer JH, Mac G, Ball DR: The effect of cricoid pressure on the cricoid cartilage and vocal cords: An endoscopic study in anaesthetised patients. *Anaesthesia* 2000; 55:263–8
- Haslam N, Parker L, Duggan JE: Effect of cricoid pressure on the view at laryngoscopy. *Anaesthesia* 2005; 60:41–7
- Tournadre JP, Chassard D, Berrada KR, Boulétreau P: Cricoid cartilage pressure decreases lower esophageal sphincter tone. *ANESTHESIOLOGY* 1997; 86:7–9
- Garrard A, Campbell AE, Turley A, Hall JE: The effect of mechanically-induced cricoid force on lower esophageal sphincter pressure in anaesthetised patients. *Anaesthesia* 2004; 59:435–9
- Walton S, Pearce A: Auditing the application of cricoid pressure. *Anaesthesia* 2000; 55:1028–9
- World Federation of Societies of Anaesthesiologists: Rapid sequence induction. Available at: <https://anaesthesiology.gr/media/File/pdf/-Rapid-Sequence-Induction.pdf>. Accessed June 5, 2021.
- Kluger MT, Short TG: Aspiration during anaesthesia: A review of 133 cases from the Australian Anaesthetic Incident Monitoring Study (AIMS). *Anaesthesia* 1999; 54:19–26
- Mistry R, Frei DR, Badenhorst C, Broadbent J: A survey of self-reported use of cricoid pressure amongst Australian and New Zealand anaesthetists: Attitudes and practice. *Anaesth Intensive Care* 2021; 49:62–9
- Higgs A, McGrath BA, Goddard C, Rangasami J, Suntharalingam G, Gale R, Cook TM; Difficult Airway Society; Intensive Care Society; Faculty of Intensive Care Medicine; Royal College of Anaesthetists: Guidelines for the management of tracheal intubation in critically ill adults. *Br J Anaesth* 2018; 120:323–52
- Frerk C, Mitchell VS, McNarry AF, Mendonca C, Bhargava R, Patel A, O'Sullivan EP, Woodall NM, Ahmad I, Difficult Airway Society intubation guidelines working group: Difficult Airway Society 2015 guidelines for management of unanticipated difficult intubation in adults. *Br J Anaesth* 2015; 115:827–48
- Gwinnutt M, Gwinnutt J, Robinson D: The use of cricoid pressure during rapid sequence induction in trauma patients – UK and European practice compared. *Trauma* 2016; 18:21–7
- Jensen AG, Callesen T, Hagemo JS, Hreinsson K, Lund V, Nordmark J; Clinical Practice Committee of the Scandinavian Society of Anaesthesiology and Intensive Care Medicine: Scandinavian clinical practice guidelines on general anaesthesia for emergency situations. *Acta Anaesthesiol Scand* 2010; 54:922–50
- Piepho T, Cavus E, Noppens R, Byhahn C, Dörger V, Zwissler B, Timmermann A: S1 guidelines on airway management. Guideline of the German Society of Anesthesiology and Intensive Care Medicine. *Anaesthesist* 2015; 64(suppl 1):S27–40
- Law JA, Duggan LV, Asselin M, Baker P, Crosby E, Downey A, Hung OR, Kovacs G, Lemay F, Noppens R, Parotto M, Preston R, Sowers N, Sparrow K, Turkstra TP, Wong DT, Jones PM, Canadian Airway Focus Group: Canadian Airway Focus Group updated consensus-based recommendations for management of the difficult airway: Part 2. Planning and implementing safe management of the patient with an anticipated difficult airway. *Can J Anaesth* 2021; 68:1405–36
- Soar J, Böttiger BW, Carli P, Couper K, Deakin CD, Djärv T, Lott C, Olasveengen T, Paal P, Pellis T, Perkins GD, Sandroni C, Nolan JP: European Resuscitation Council Guidelines 2021: Adult advanced life support. *Resuscitation* 2021; 161:115–51

22. Avery P, Morton S, Raitt J, Lossius HM, Lockey D: Rapid sequence induction: Where did the consensus go? *Scand J Trauma Resusc Emerg Med* 2021; 29:64
23. Priebe H-J. Use of cricoid pressure during rapid sequence induction: facts and fiction. *Trends Anaesth Crit Care* 2012;2:123–8
24. Turnbull J, Patel A. Cricoid pressure: The argument against. *Trends Anaesth Crit Care* 2015;5:52–6
25. Calder I, Yentis SM: Could 'safe practice' be compromising safe practice? Should anaesthetists have to demonstrate that face mask ventilation is possible before giving a neuromuscular blocker? *Anaesthesia* 2008; 63:113–5

*(Accepted for publication October 7, 2021. Published online first on November 17, 2021.)*

---
